# Supplementary material for: Spectroscopic/colorimetric dual-mode rapid and ultrasensitive detection of reactive oxygen species based on shape-dependent silver nanostructures
Source: Royal Society of Chemistry journal article supplement (doi:10.1039/d3ay01749d), 2023-01-01
Supplement: d3ay01749d1.pdf [file d3ay01749d1.pdf]

## Electronic Supplementary Information

### Spectroscopic/colorimetric dual-mode rapid and ultrasensitive detection of reactive oxygen species based on shape-dependent silver nanostructures

Varsha UshaVipinachandran and Susanta Kumar Bhunia\*

Department of Chemistry, School of Advanced Sciences, Vellore Institute of Technology, Vellore, 632014, India

\*Corresponding author email: [susanta.bhunia@vit.ac.in](mailto:susanta.bhunia@vit.ac.in) ; [susanta.chem@gmail.com](mailto:susanta.chem@gmail.com)

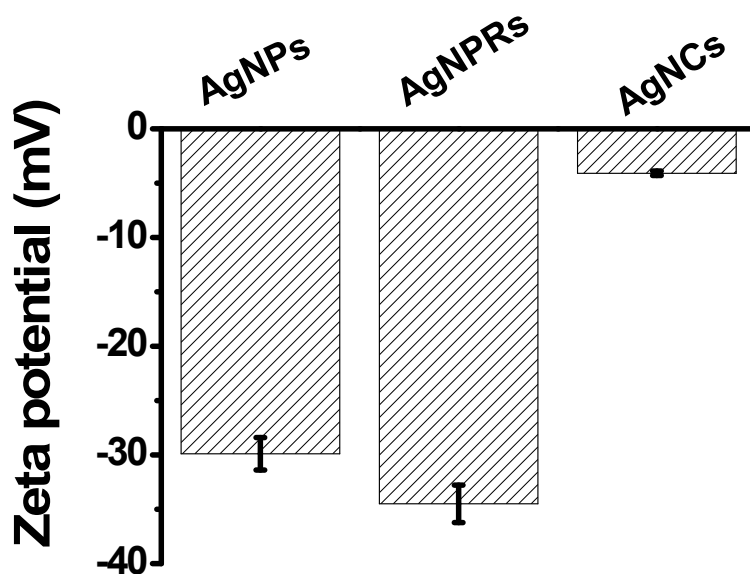

Fig. S1. Zeta potential of AgNPs, AgNPRs and AgNCs.

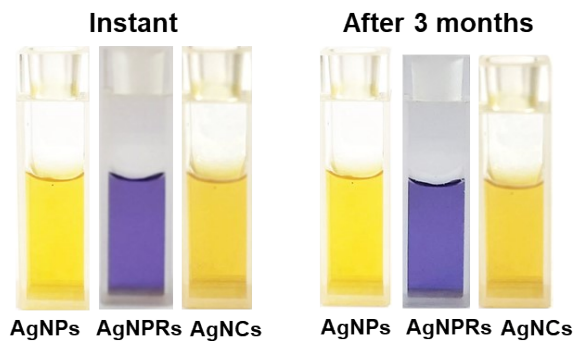

**Fig. S2.** Colloidal dispersion of AgNPs, AgNPRs, and AgNCs as synthesized and after 3 months storage.

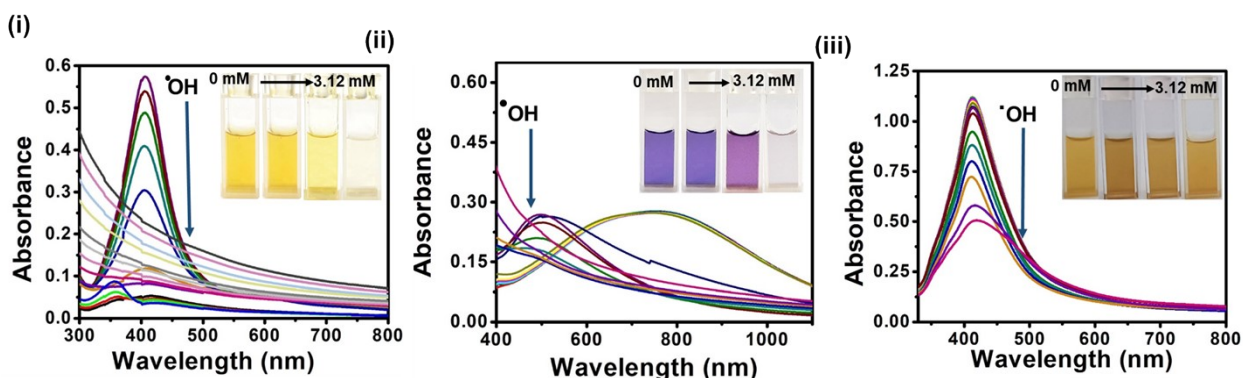

**Fig. S3.** UV-vis absorbance spectra of (i) AgNPs, (ii) AgNPRs, and (iii) AgNCs for OH radical.

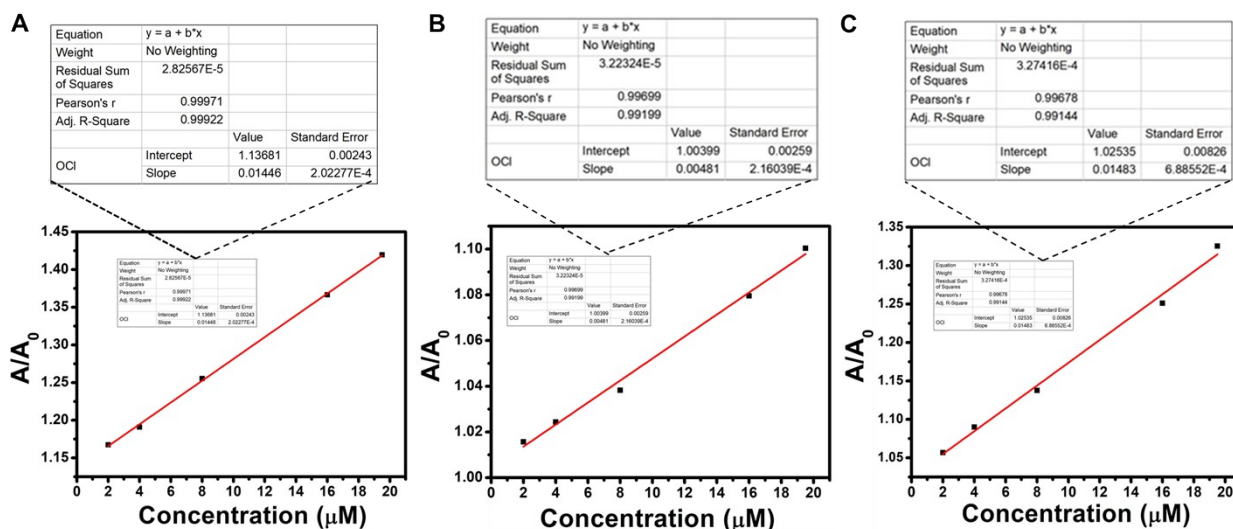

**Fig. S4.** Linear plots of  $A/A_0$  vs. the concentration of  $\text{ClO}^-$  for (A) AgNPs, (B) AgNPRs and (C) AgNCs.

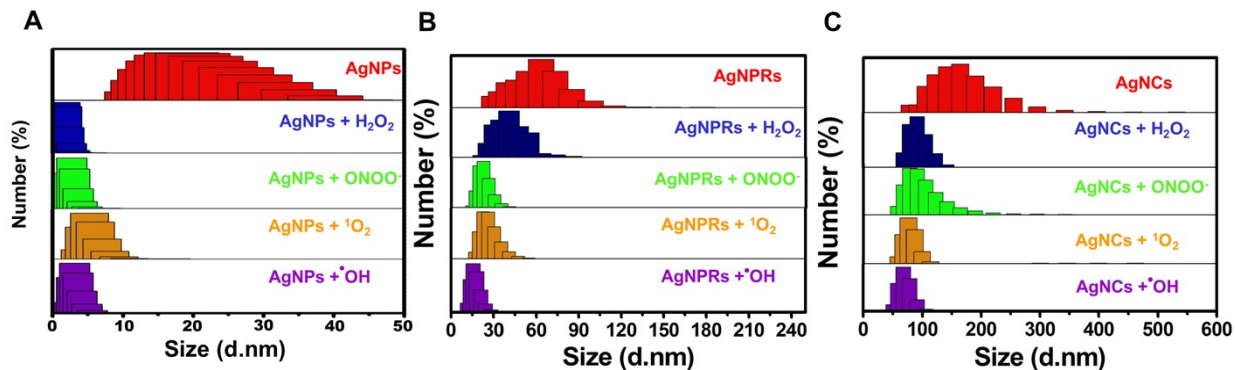

**Fig. S5.** DLS analysis of AgNPs, AgNPRs and AgNCs with different ROS analytes at a concentration of 3.12 mM.

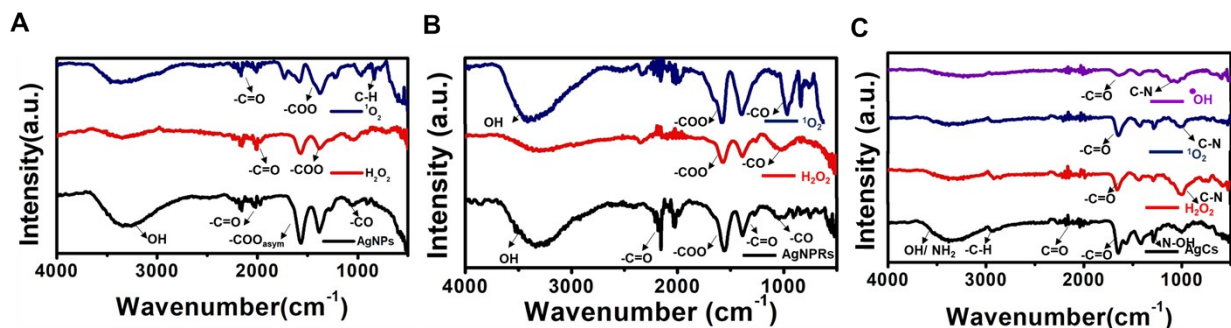

**Fig. S6.** FTIR spectra of (A) AgNPs, (B) AgNPRs and (C) AgNCs with different ROS.

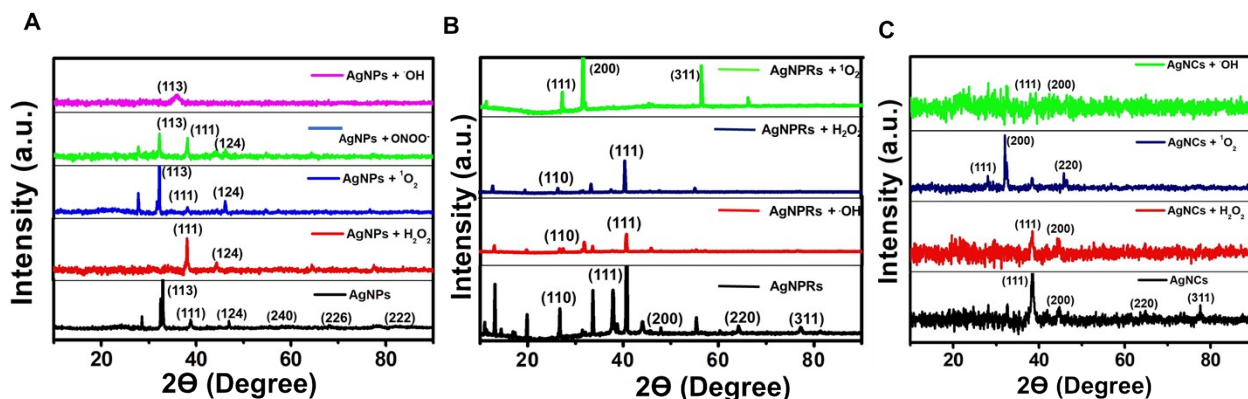

**Fig. S7.** XRD spectra of (A) AgNPs, (B) AgNPRs and (C) AgNCs in the presence of multiple ROS.
